# Supplementary material for: Xylem specific activation of 5’ upstream regulatory region of two NAC transcription factors (MusaVND6 and MusaVND7) in banana is regulated by SNBE-like sites
Source: PubMed Central journal article supplement (PMC5811034; doi:10.1371/journal.pone.0192852), 2018-02-13
Supplement: pone.0192852.s001.pdf [file pone.0192852.s001.pdf]

```

-1068 CCTCGAAAGG AAAAGGTCAT GATATTTTAT GTATATATGC ATACATCATA
-1018 CATATATATA ATCAACGCAT GGTCCTATCT TGGTGCATTA ATTATGTTCC
-968 AAGTCATGGA ACTTCTGTTA TCCCTTCCCC TCCTGACTTA AATAGCATGC
-918 ATCATGCGAA AAGCCAAGTG TTCTTTGTTT GTGCAAGCTT CAATTAATGA
-868 TCCTTGTCCT GAAGCTAATC TTGGCCTGAA ACTGGACTGT GGACACGAAT
-818 GATTGAGTGT ACGATGCAAG GCACATTCCC AGTGCACATA AAGCAACAAG
-768 TGCCATAGGG TGGTCCTTCC TTTGGCTGCC TCCACATCTT GACTTCCAGA
-718 CCAAGTAGCC TTGCAGCATA AAATAGCGGC GCAAAGGGGG GCTGTTGGTG
-668 TGCATGAGAG AGGTGGCGGT GGCTTAAGAT TTCTTTCTTG CTGTTGCCCC
-618 CACCGCCCAA ATCGCCCTCA GGCCACCCTC TCCTTCTCTC CTTTCCCGTT
-568 CCTGTTTGAT CACTGCACGC GCACTCGATG GCTGCTAACC CCCCCTCTCT
-518 TCCTTTCTTT ACATTCCTCC TTTTTATTCT TTGTCCTTCC ATCGCCTTCT
-468 GAACTTTGTA TATAAGCCTG GACAGCCTCT AAAC TAGCAT TTTCTGTCTC
-418 TCACTTTCTC TCTTTCTCCT TCTGCACGCG AAGAAGCCTG GCTGCCGGTG
-368 AGTTCCTCAA CATCTCAGAG TAAATTACGC TGTTCCGCAG AGCTTACTGT
-318 GGTCGTACCG TCTTTCTCCT CCTCCACTGA GAGCATGTGG AAACCATAGC
-268 TATTGTAGGT ATATGCTTCT CTCTTGCAGC CTTGGGAAAT CGAGGTGTGG
-218 TGGTCACTGA AACTGAAAGC AGCCACATCA TTGGCGTGCA CTCAAAGAAA
-168 CATAGGCATG ATTGAAATTT ATAGTCAATT TTCCATCTG CTTTCTATGT
-118 TATACTCACT AAGATGATCA GATCTAGAAC TTCGAAATAT ATTCCATACG
-68 CTTGTTGAAT TCCAAGTATG GGATGTTCTT AATTATATAA AAGATTTAGA
-18 ATGGGATATA ATGTAAATAG CATTACCTTC TTGCACTGAT GGTGTACCAG
      +1 TSS
  33 GTCATTTTCC AATCAATTCC TCCTATTTGC TTTCTAGATT TTGGGGATCT
  83 CTTTGATGAG GGTCTAAATC TTGTAGGGCC CGCTCATCAC CTCTTCATCC
 133 ATCTTAACTT GGTGCGAGGT CTCCAGGTGA ATCCACA

```

**Fig S1**
