# Supplementary material for: Xylem specific activation of 5’ upstream regulatory region of two NAC transcription factors (MusaVND6 and MusaVND7) in banana is regulated by SNBE-like sites
Source: PubMed Central journal article supplement (PMC5811034; doi:10.1371/journal.pone.0192852), 2018-02-13
Supplement: pone.0192852.s002.pdf [file pone.0192852.s002.pdf]

```

-844 AAGCATTTCAT TCCACGTACT TGGAACCTTT TCGCCAACCA GTCTCAGCAC
-794 TCTTCGGTAA CCAGTAAGAG CTATTCCTTC TCCCACCTCTC ATCTCCCTCC
-744 CTCCTCTCT CCACACACAC ACACACACAC ATAATTATGT TTCTGAGCTT
-694 GCATTTTCTG GTCACAGATC GAAGGTGATA CGATTTGTAT GATTTCATGA
-644 TATATCGGTA CATAATTGCG TCTTTATTGC ATGAAGAGCT TCGATCATCC
-594 CAGTCTTTTA AATGTTGATG TAAATCTTTA TGTTTGTTTG ATGCTTTCTA
-544 AAGCTTTTCT AGCTGATCAA GCCAATATTG TCAGAATACA TCTTTTCCTT
-494 CGCGGCCATC AACGATGAGA GATTACCTCA AGAACATGCC ATGAATTCAC
-444 TCTCTACATA TAATTTTTGT AACCTTTTGT GATTAAAATA TCGTTGTGTC
-394 TATCTTCATC ACCTTCTGTG GTATTCTTCT GTGTAAAGGG ACATTGTTGC
-344 TTTGTTTCATG GGACGATCAC ATTAGTTCTC AGATAATTAA TATGCATTTA
-294 CGCACTTCGG TAGTCTGCAT ATTACAGCAT GTATAATTGC CTGGACTACC
-244 ATGTTCTTCT AATGACAAGG CAAGAATCTT GAGCCCTACA ACTAGGTTTT
-194 GAACATGAAT CAATCACTTG TTGCTCCTCT AATAGCAACA TTTATCCATT
-144 TCGCATGCTC TAATCCACAA ACAACATTTA TCCATTTTGT TTTGTTTATA
-94 CCCATCTTAC AAAGCTGTGT ATGTTTATTT ACCTGTAGAC TACTATGTGA
-44 AGTATCTCGG AATATAAAGC TCTTGCATCA TTTACCCATC TTTGAGCATT
      7 TCTTGGAATG AGTCATTGAT TGTTCAATTA TTTGAGTCAG AGACAATGGT
      57 AGGTTCCCTAA GAAGCTATGA ATCTTTTCCA AATAGCTCTT CTAATCTGAA
107 CATTGATGT CACCTCTCAC ACTCTTTACC TCCTCCTATG CATGGAGTCC
157 TATTCAAATT CGATCTGGCA TTCCAATCTC AATACATGCT TCTGTTTGCT
207 GGATCACTAC TCAAACACAA GCTCAGCAA TGTCTAATTC TCCTGGAAGT
257 CACATCTGCA GAACTTAACC ACACTTTAAA TCACTTCGCA TGA

```

Fig S2
