# Supplementary material for: Xylem specific activation of 5’ upstream regulatory region of two NAC transcription factors (MusaVND6 and MusaVND7) in banana is regulated by SNBE-like sites
Source: PubMed Central journal article supplement (PMC5811034; doi:10.1371/journal.pone.0192852), 2018-02-13
Supplement: pone.0192852.s004.pdf [file pone.0192852.s004.pdf]

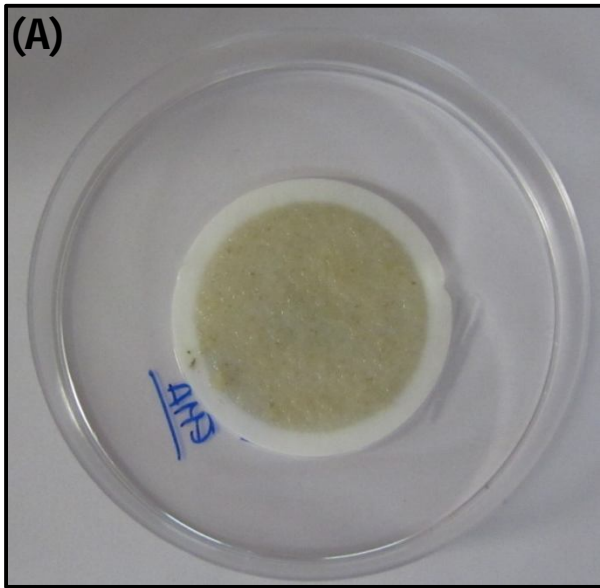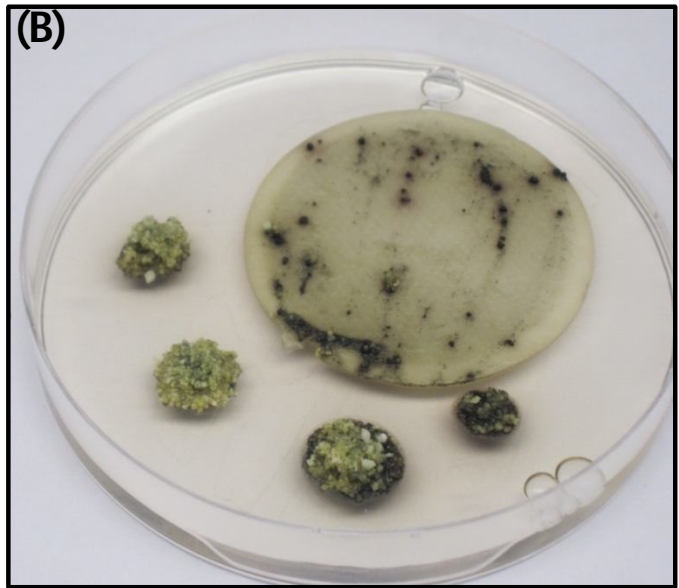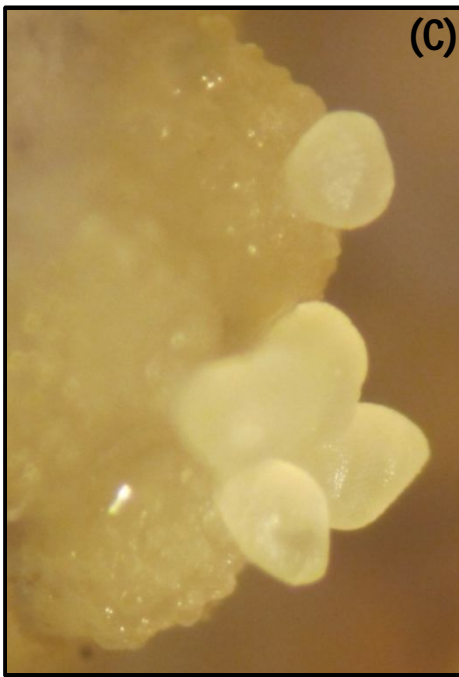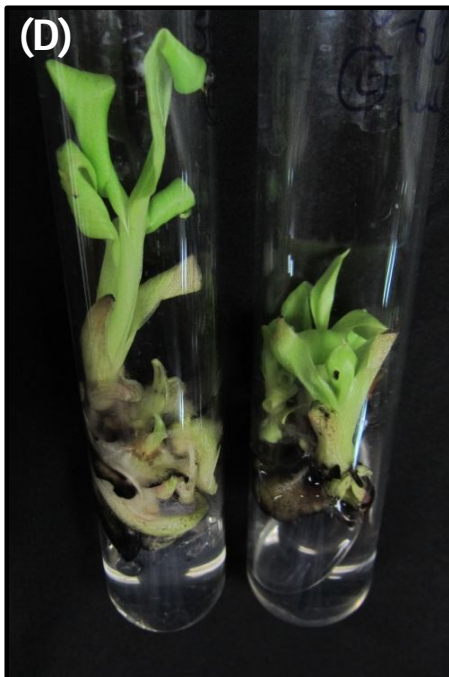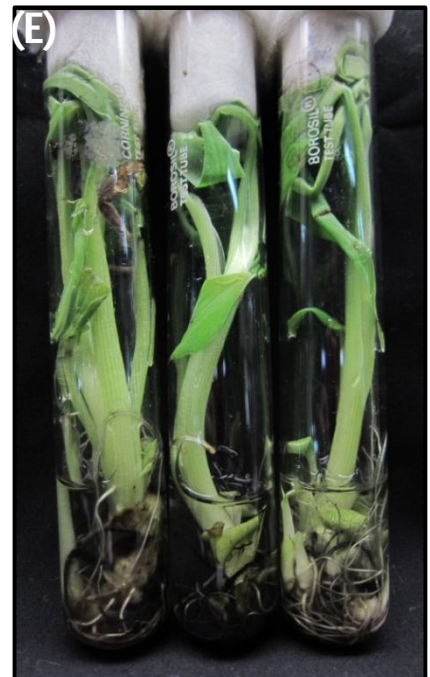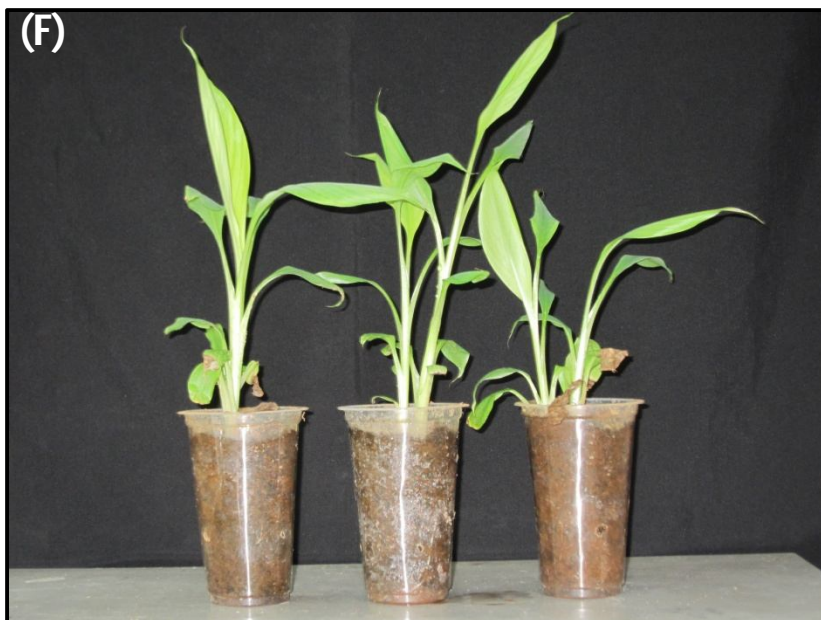

Fig S4
